1           **Prioritization of disease genes from GWAS using ensemble based positive-**  
2                                           **unlabeled learning**

3

4

5

6 Nikita Kolosov<sup>1,3</sup>, Mark J. Daly<sup>2,3,4,\*</sup>, Mykyta Artomov<sup>1,2,3,4,\*</sup>

7

8     <sup>1</sup> – ITMO University, St. Petersburg, Russia

9     <sup>2</sup> – Analytic and Translational Genetics Unit, Massachusetts General Hospital, Boston,

10    USA

11    <sup>3</sup> – Broad Institute, Cambridge, USA

12    <sup>4</sup> – Institute for Molecular Medicine Finland (FIMM), Helsinki, Finland

13    \* - correspondence: [artomov@broadinstitute.org](mailto:artomov@broadinstitute.org), [mjdaly@atgu.mgh.harvard.edu](mailto:mjdaly@atgu.mgh.harvard.edu)

14

15    **Authors declare no conflict of interests.**

16

## 17 **Abstract**

18 Major complication in understanding disease biology from GWAS arises from  
19 inability to identify a complete set of causal genes. Integration of multiple omics data  
20 sources could provide an important functional link between associated variants and  
21 candidate genes. Machine-learning could take advantage of this variety of data and  
22 provide a solution for prioritization of disease genes. Yet, classical positive-negative  
23 classifiers impose strong limitations on the gene prioritization procedure, such as lack of  
24 reliable non-causal genes for training.

25 Here, we developed a novel gene prioritization tool - Gene Prioritizer (GPrior). It is  
26 an ensemble of five positive-unlabeled bagging classifiers, that treat all genes of unknown  
27 relevance as an unlabeled set. GPrior selects an optimal combination of algorithms to  
28 tune the model for each specific phenotype.

29 Altogether, GPrior fills an important niche of methods for GWAS data post-  
30 processing, significantly improving the ability to pinpoint disease genes compared to  
31 existing solutions.

## 32 **Introduction**

33  
34 Despite the tens of thousands of genetic associations identified using GWAS to  
35 date, the ultimate goal - informing and guiding therapeutic development - has been  
36 achieved for only a few phenotypes. A major complication in understanding disease  
37 biology from GWAS often arises from inability to directly identify disease genes <sup>1</sup>.  
38 Therefore, additional post-GWAS analysis is needed to first, identify a variant that drives  
39 the signal within the locus, and then to connect this variant to a gene.

40 Fine-mapping, based on a Bayesian framework, sets out to prioritize variants  
41 within the locus and, ultimately, identify the disease-causing variant <sup>2,3,4</sup>. Fine-mapping  
42 algorithms - FINEMAP <sup>5</sup>, PAINTOR <sup>6</sup>, fGWAS <sup>7</sup>, SUSIE <sup>8</sup> etc. had significant impact on  
43 the field and had successfully identified causal variants for multiple traits. Importantly,  
44 fine-mapping is done independently for each locus and in its current configuration does  
45 not take advantage of biological relatedness (e.g., same pathway membership) of genes  
46 involved in a phenotype <sup>9</sup>.

47 At the same time, identification of the disease gene linked to a disease-causing  
48 variant presents a major and yet unresolved challenge. Most GWAS associations  
49 implicate a set of correlated genetic variants, none of which alter the protein-coding  
50 sequence of a gene and which often physically span or are near to multiple genes. Since  
51 our knowledge of regulatory sequence patterns of the genome, the relevant cells, tissues  
52 and developmental time points relevant to disease are all incomplete, it is currently the  
53 case that the vast majority of GWAS 'hits' do not have a certain link to a gene. Though

54 data sets with which to infer functional annotation and gene expression are growing  
55 rapidly in their utility.

56 Post-processing of the GWAS results with inclusion of functional information is a  
57 promising direction on the road to identify disease genes. For example, Post-GWAS  
58 Analysis Platform (POSTGAP<sup>10</sup>) uses GWAS summary statistics along with LD-structure  
59 and external functional databases (GTEx<sup>11</sup>, FANTOM5<sup>12</sup>, RegulomeDB<sup>13</sup> etc.) to  
60 prioritize SNPs within the locus and narrow down the list of potential gene candidates.  
61 Yet, the gene prioritization utility of POSTGAP is still in early development.

62 Altogether, fine-mapping, functional annotations and known biologic relatedness  
63 across putative disease genes become valuable data sources for gene prioritization,  
64 defined as evaluation of the likelihood of gene involvement in generating a disease  
65 phenotype<sup>14</sup>. Machine-learning (ML) based prioritization could take an advantage of  
66 these data sources and provide a solution for novel disease gene identification.

67 Typically, existing ML solutions use Positive-Negative (PN) classification strategy.  
68 In PN classification per-gene probabilities are obtained by using known disease genes as  
69 a positive (P) training set and unknown genes as a negative (N) training set<sup>15, 16, 17, 18</sup>.  
70 Such an approach suffers from contamination of a negative set by hidden positives (HP),  
71 represented by yet undiscovered disease genes. Additionally, it is challenging to find  
72 reliable negative examples (i.e., genes that with certainty do not contribute to the  
73 development of a phenotype). Most biological databases do not store negative evidence  
74 (e.g., absence of gene interaction), rather they provide only observed positive evidence.  
75 As a result, PN-classifiers could suffer from high false-negative prediction rates and  
76 biased quality metrics.

77 It is feasible to design a model, where a limited number of reliable positive  
78 examples (likely causal genes) will be used along with the rest of genes without treating  
79 the latter as reliably negatives. Positive-Unlabeled (PU) learning has been developed to  
80 overcome limitations of PN-learning. PU-learning treats unknown examples as a mixture  
81 of P and N, called unlabeled (U) set.

82 PU-learning was first proposed by Denis et al.<sup>21</sup>, and several algorithms have been  
83 published since then<sup>19,20,21</sup>. A particular class of PU methods - PU-bagging, showed the  
84 best stability of the learning algorithm<sup>22</sup>. Specifically, Mordlet et al.<sup>22</sup> proposed the  
85 “bagging SVM” approach that took advantage of a limited number of positive examples  
86 and significantly improved performance and stability of classification using a new  
87 aggregation technique.

88 Nevertheless, a single ML algorithm cannot fit all complex phenotypes and highly  
89 heterogeneous biological data. To overcome this, Yang et al.<sup>23</sup> introduced a concept of  
90 integration for several PU learning classifiers into one workflow using ensemble  
91 technique. This technique was only tested with a specific family of PU algorithms - two-  
92 step methods, heuristic in nature and sensitive to the initial choice of negative examples  
93<sup>24</sup>, significantly limiting applicability to GWAS data. Two-step PU algorithms first

94 attempted to identify negative examples in the unlabeled set, and then train a model from  
95 the positive, unlabeled and likely negative examples. However, directly learning to  
96 discriminate P from U with estimation of optimal misclassification costs leads to better  
97 results <sup>25</sup>.

98 Therefore, combination of different ML algorithms (kernel-based and tree-based)  
99 along with PU bagging is a promising strategy for building a gene-prioritization model  
100 suitable for a large number of complex phenotypes and high variety of data sources, that  
101 is still lacking in the field.

102 Here, we propose a novel PU-learning based gene prioritization tool - Gene  
103 Prioritizer (GPrior), intended for post fine-mapping usage of GWAS results. In GPrior we  
104 implemented the ensemble of 5 different ML classifiers for PU-bagging with further  
105 selection of the optimal combination of predictions. Our approach returns probability  
106 scores for the whole provided set of genes based on similarity level with positive examples  
107 and is complementary to any other gene prioritization tools and fine-mapping techniques.

108 We illustrate the utility of PU-learning and GPrior with common public ML quality  
109 evaluation dataset with known ground truth and a series of case studies. Comparison with  
110 popular methods (TOPPGENE <sup>26</sup>; Bagging SVM <sup>22</sup>; MAGMA <sup>27</sup>) confirmed significantly  
111 higher quality of predictions returned by GPrior.

## 112 **Methods**

113 GPrior was designed for prioritizing disease-relevant genes given a matrix of gene-  
114 level features and a set of reliably causal genes. We integrated multiple ML techniques  
115 in a single tool and a data-driven framework to select the most appropriate algorithm (or  
116 combination of algorithms) on a case-by-case basis.

117 The prioritization scheme includes two independent steps. First, each ML algorithm  
118 is used for positive-unlabeled bagging and generation of predictions for each gene.  
119 Second, the best-performing combination of predictions is generated. To ensure the  
120 independence of steps, a set of true genes that is used for training is separated into two  
121 parts – set of genes for training individual ML algorithms and an algorithm evaluation set  
122 (**Figure 1, Sup. Figure S1**). The latter is used to evaluate the quality of predictions from  
123 ML algorithms and select predictions that will contribute to the optimal combination.  
124 Altogether, such an approach allows to combine multiple learning algorithms and achieve  
125 previously unattainable for an individual algorithm performance.

126

### 127 Input and Features

128

129 In addition to the described above true gene sets needed for training, GPrior  
130 requires a data matrix with rows representing genes and columns representing features.

131 GWAS summary statistics contains only variant information which needs to be  
132 converted into gene level data. Initially, we filtered out likely non-associated variants with

133 the threshold determined on case-by-case basis, ensuring inclusion of the majority of  
134 potentially causal genes (even if no significant association was observed in GWAS) into  
135 the prioritization analysis. Otherwise, GWAS  $p$ -values were not a part of the prioritization  
136 model.

137 Next, we used POSTGAP<sup>10</sup>, which takes advantage of LD structure and variant  
138 functional annotations to assign potential gene candidates for each variant. Such  
139 preprocessing of GWAS summary statistics yields a variant-based data matrix with  
140 mappings to a list of candidate genes.

141 A major challenge in transforming variant-based data into gene-based data matrix  
142 for GPrior is preservation of valuable information about variant annotations. We used a  
143 transformation of variant-level features (e.g. functional annotations, GERP scores, etc)  
144 into gene-level features using a method proposed by Lehne et al.<sup>28</sup> to obtain a gene-  
145 based data matrix.

146 In addition, we used gene expression and gene interaction data that proved their  
147 utility for the gene identification problem in previous works<sup>15, 29, 30</sup>. Specifically, we used  
148 the GTEx database to obtain median gene expression levels for 53 tissues and Reactome  
149<sup>31</sup> and UCSC (GeneSorter)<sup>32</sup> databases were used for gene interaction data (**Sup. Table**  
150 **S1**).

151 Additional functional features and predictions of other prioritization algorithms  
152 could be included in the data matrix to be used for GPrior model to boost the performance  
153 quality<sup>33</sup>. GPrior could take as an input either the raw output of POSTGAP (variant-based  
154 data matrix) or any gene-based data matrix provided by a user.

155 We kept the same set of features for the case studies to preserve the fairness of  
156 performance comparisons for different phenotypes. Although, for each phenotype  
157 features could be selected in concordance with phenotype-specific needs, for example,  
158 relevant cell type expression data. Overall, GPrior is not bound to a pre-specified set of  
159 features and could be used with any user-defined set of features to boost the trait-specific  
160 performance.

161

### 162 Feature preprocessing

163

164 As for any ML approach, prior to algorithm execution, features should undergo  
165 preprocessing procedure to equalize scales and eliminate potential performance biases.

166 In gene prioritization, raw data sets can potentially reach hundreds or thousands  
167 of features. Along with a limited number of positive examples, this enormity can lead to  
168 the “curse of dimensionality”<sup>34</sup>. Hypothetically, the more features are available in the data  
169 the more accurate result should be expected. However, greater number of features leads  
170 to the exponential growth of the training examples amount, required to cover the sparse  
171 feature space and achieve acceptable prediction quality. In real-life applications, the  
172 number of positive examples is limited, therefore, conventionally this problem is solved

173 by clustering raw features. GPrior uses agglomerative feature clustering as a  
174 dimensionality reduction technique to extract appropriate number of features and achieve  
175 the highest performance (**Suppl.Methods, Input and Features**).

176

### 177 GPrior algorithm

178

179 GPrior consists of five PU Bagging ensembles, each of them uses a different  
180 classification algorithm: Logistic Regression (LR), Support-Vector Machine (SVM),  
181 Decision Tree (DT), Random Forest (RF), Adaptive boosting (AB) (**Figure 1, Sup.**  
182 **Methods, GPrior Algorithm**).

183 Each positive-unlabeled bagging procedure starts with a creation of a training set  
184 with all positive (P) instances, treated as Positives, and a random subsample of  
185 unlabeled, size of P, treated as negatives. Resulting in the size of a bootstrap sample  
186 being equal to P. This way, on each iteration only a small portion of unlabeled instances  
187 is treated as negatives, minimizing false negative error rate (**Sup.Figure S2**). Each  
188 learning method is then fine-tuned by finding an optimal set of parameters (**Sup. Table**  
189 **S2**).

190 After training and tuning, individual classifiers generate a probability score for each  
191 gene to belong to the positive class. All the steps are repeated  $T$  times. Per-gene  
192 probabilities are obtained by dividing the sum of all predictions by the number of times  
193 each gene was sampled from the unlabeled set. All the predictions are averaged and  
194 stored as a final PU Bagging result. All the steps are repeated for each classification  
195 algorithm.

196 Next, GPrior selects the combination of predictions that shows the best  
197 performance in prioritizing true genes from an independent algorithm evaluation set.  
198 Since “true negative” data points that falsely were classified as positives could not be  
199 identified in PU-data, any metric depending on false positives could not be applied for  
200 quality evaluation. We used *PU-score* as a formal quality metric suitable for positive-  
201 unlabeled data classes<sup>25, 35</sup> (**Sup. Methods**).

202 All combinations from individual predictions are evaluated using *PU-score*  
203 calculated for algorithm evaluation set and the best performing composition of methods  
204 is then selected as the best fitting for a given phenotype. Selected combination is used to  
205 return a vector of probabilities corresponding to the genes in the input matrix.

206

## 207 **Results**

### 208 Performance evaluation

209

210 The number of known true positive and negative data points is a critical information  
211 parameter for gene prioritization. It is challenging to estimate both the number of genes

212 involved in a complex trait and the number of genes confidently irrelevant for the disease.  
213 Height, as a classic example of a highly polygenic trait, shows effect size for a median  
214 GWAS SNP in the genome about 10% of that for genome-wide significant hits. This  
215 suggests that in current GWAS for height, significant associations are observed only for  
216 a small proportion of true positive data points, while many others are yet to be confirmed.  
217 However, additional alleles at known genes are a likely source of much of what is missing  
218 so this does not easily translate into an estimate of how many relevant genes are  
219 implicated from a GWAS. As shown in recent works, the genetic architecture of height is  
220 broadly similar to that of a wide variety of other quantitative traits and diseases ranging  
221 from diabetes or autoimmune diseases to BMI or cholesterol levels <sup>36</sup> – for all of which  
222 the evidence suggests many more positive genes exist in the ‘currently not associated’  
223 gene set. Additionally, only some of the genome-wide significant loci were mapped to a  
224 single gene, even further reducing the number of known true genes suitable for training  
225 a model. Therefore, it is reasonable to assume that gene prioritization algorithms should  
226 expect to be trained using only a small fraction of all disease-relevant genes.

227 Due to inability to obtain a GWAS dataset with confidently identified complete sets  
228 of the disease genes and disease irrelevant genes, for initial GPrior performance  
229 evaluation we used a public benchmark dataset. Breast Cancer Wisconsin (Diagnostic)  
230 Data Set - a popular public dataset for machine learning tools benchmarking was used to  
231 compare performance of GPrior to conventional PN-learning (biased SVM <sup>37</sup>) and single  
232 PU-learning algorithm - bagging-SVM <sup>22</sup> (**Suppl.Methods, GPrior Performance**  
233 **Evaluation**). The data with known true positives and true negatives enables calculation  
234 of fair prediction error rates which is impossible for real life data with yet undiscovered  
235 true data points. While this dataset is not related to the gene prioritization problem, it  
236 clearly illustrates the benefits of ensemble PU-learning in case of only a small fraction of  
237 known true instances to be used for training.

238 The dataset contained 569 samples and 30 features (**Figure 2A**). Initially, we  
239 assumed that only 4% of true positive class samples (malignant tumors in the Breast  
240 Cancer Wisconsin data), are known and available for training. Since GPrior requires two  
241 independent true sets for training, the original known positive class was broken down into  
242 two parts – 5 samples were used for training and 3 for algorithm evaluation set. For all  
243 other methods the whole known positive class was used as a single batch.

244 We performed PCA to highlight how data classes are recognized in PN and PU-  
245 learning (**Figure 2B**). PN-learning treats all instances as true negative, except those used  
246 for training (known positives). This way, PN-learning attempts to identify samples falsely  
247 classified to be true negative. In opposite, PU-learning treats all instances not used for  
248 training as unlabeled and is, therefore, free from assumption that true negative class  
249 exists. GPrior generated predictions using each algorithm and algorithm evaluation set  
250 was used to estimate *PU*-scores (**Suppl. Figure S3A**). All combinations of 5 algorithms  
251 available in GPrior were tested and the combination with the best *PU*-score estimated

252 from the algorithm evaluation set was selected to return the results (**Suppl. Figure**  
253 **S3B,C**).

254 Precision-recall analysis was used to determine optimal decision threshold for  
255 each method and ensure that best possible performance was extracted from each  
256 algorithm (**Figure 2C,D**). As a result, GPrior carefully identified corresponding sample  
257 classes ( $F1 = 0.916$ , **Suppl.Figure S4A, B**), while PN-learning fails to achieve similar  
258 performance ( $F1=0.551$ , **Suppl.Figure S4A, C**).

259 Testing all 3 methods - biased SVM, bagging SVM and GPrior for different fractions  
260 of known positives (100 simulations) results in superior performance of the latter (**Figure**  
261 **2E**). Notably, PN-learning starts to behave equally well compared to PU-learning only if  
262 more than 30% of the true positive data points are already known and used for training.

263 For the benchmark dataset, with pre-specified true positives it is possible to  
264 compare  $F1$ -score and  $PU$ -score metrics. Both metrics show similar results, justifying  
265 further usage of  $PU$ -score for GPrior performance evaluation in case studies, where  $F1$ -  
266 score could not be computed (**Figure S4D, E**).

267 Additionally, we tried to fix contamination of unlabeled-class with hidden positives  
268 and change only the number of KP without changing the percentage of contamination to  
269 make the setup even more fair for PN and PU learning. Despite this, we obtained better  
270 results from GPrior (**Figure S5**).

271 To illustrate utility and performance quality of GPrior we performed several case  
272 studies using GWAS results for several phenotypes: inflammatory bowel disease (IBD),  
273 educational attainment (EA), coronary artery disease (CAD) and schizophrenia (SCZ).

#### 274 Case study 1: Inflammatory bowel disease (IBD)

275  
276 We used GPrior and summary statistics from Huang et al. <sup>38</sup>, to construct gene  
277 prioritization for IBD. Summary statistics was preprocessed to obtain a data matrix with  
278 2,166 gene candidates found in loci with original  $p$ -value  $< 10^{-8}$ . A list of 31 genes with  
279 known evidence to be likely causal for IBD was used as a positive training set. Algorithm  
280 evaluation set consisted of 14 genes reported in monogenic loci with  $p$ -value  $< 10^{-10}$  found  
281 in GWAS catalog. Independent validation set used only for performance evaluation  
282 included 51 genes found within monogenic loci with  $p$ -values falling in range  $10^{-10} - 10^{-8}$   
283 (**Figure 3A, Suppl. Table S3**).

284 We generated gene priorities using GPrior (**Sup. Table S4**) and a set of methods  
285 for comparison - a single PU-learning (bagging-SVM <sup>22</sup>), PN-learning (weighted LR <sup>25</sup>)  
286 and TOPPGENE <sup>26</sup>. While GPrior implies two training steps and usage of two training  
287 gene sets – true gene set and algorithm evaluation set, for other methods we used a  
288 union of the two gene sets for training.

289 Next, we compared the performance quality of the methods.  $PU$ -score is a formal  
290 quality metric for a ML-based classifier, rather than for a prioritization itself, and it depends



291 on the decision threshold used to assign classes to the instances. Gene prioritization  
292 implies only a construction of the ranked list of genes, but not the classification of the  
293 genes into “disease” and “non-disease”. Yet, we evaluated the maximal possible  
294 performance of the methods in the classification problem. We used an independent  
295 validation gene set to estimate *PU*-scores for all possible decision thresholds (fraction of  
296 positive predictions made by the classifier) and GPrior has significantly greater maximal  
297 *PU*-score compared to others (**Figure 3B**).

298 To evaluate prioritization quality, we estimated cumulative gains. Gain chart shows  
299 enrichment of the genes from the validation set at the top of the ranked list of predictions,  
300 that is the sharper is the growth of gain in the beginning of the chart – the more enriched  
301 are correct predictions at the top of the predictions list (**Figure 3C**).

302 Since original GWAS summary statistics was preprocessed to include only variants  
303 with  $p$ -value  $< 10^{-8}$ , all 2,166 genes in the data matrix are found in or in a proximity of  
304 significantly associated loci. GPrior does not use association strength or DNA location  
305 information for gene prioritization. Yet, genes from the validation set are significantly  
306 prioritized over the non-relevant neighbors (Mann-Whitney, one-sided,  $p$ -value =  $2.5 \times 10^{-13}$ ,  
307 **Figure 3D**).

308 We evaluated non-randomness of the predictions, by estimating enrichment of the  
309 validation set genes at the top of the ranked list produced by GPrior (permutation  $p$ -value  
310  $< 1 \times 10^{-6}$ ; **Figure 3E**).

311 Treatment of all genes from the validation set as a finite set of disease genes,  
312 implies that all genes that are not in the validation set are true negatives. In case of  
313 polygenic traits, this is most likely a false assumption which would lead to an  
314 underestimation of the true value of the area under the *ROC*-curve (*ROC AUC*). Thus  
315 *AUC* values will illustrate only approximate quality measurement. In such settings, GPrior  
316 demonstrated the most efficient predictive power out of all tools ( $AUC = 0.8$ , **Suppl. Table**  
317 **S5**).

318

### 319 Case study 2: Educational attainment

320

321 We performed a control experiment to demonstrate that GPrior predictions are  
322 disease specific and are driven by underlying biological similarities for disease related  
323 genes. We considered two phenotypes with likely very modest overlap in underlying  
324 biological causes – IBD and educational attainment (EA). We hypothesized that usage of  
325 the training gene set fitted for IBD should fail to predict genes for EA.

326 GWAS summary statistics from Lee et al<sup>39</sup> for EA was preprocessed to obtain the  
327 data matrix of candidate genes ( $N=10,638$ ) and features (**Methods**). To eliminate  
328 potential bias in the size of training sets for the two phenotypes, we used for GPrior  
329 training only 18 genes (12 for ML training and 6 for algorithm selection) from the IBD  
330 training gene set that were also found in EA GWAS loci with  $p$ -value  $< 10^{-6}$ . As a validation

331 set for IBD we used the original IBD validation genes (N=51), for EA we used 381 genes  
332 found in monogenic loci from GWAS catalog EA results (**Sup. Table S6, Sup. Methods**).

333 Usage of appropriate training set for IBD resulted in significant enrichment  
334 (permutation  $P < 10^{-6}$ ) of validation set genes in the top predicted genes (**Sup. Figure**  
335 **S6A**). Predictions based on the same list of training genes were constructed for EA and  
336 demonstrated no enrichment of the EA-specific validation gene set (permutation  $p$ -value  
337  $p$ -value = 0.12, **Sup. Figure S6B**). Yet, usage of the EA-specific training gene set of the  
338 same size (N=18, **Sup. Methods**) led to successful prioritization of EA-specific genes  
339 (permutation  $P < 10^{-6}$ , **Sup. Figure S6C**).

340 We expanded the training set for EA by inclusion of all genes found in monogenic  
341 loci in GWAS Catalog with (N=119) and repeated prioritization analysis. As a result, we  
342 obtained even more significant enrichment for the validation set and confirmed superior  
343 performance quality of GPrior in comparison with other methods (**Sup. Figure S7, Sup.**  
344 **Tables S7, S8**).

345 Finally, we estimated how strongly initial GWAS summary statistics preprocessing  
346 contributed to the overall success of the prioritization. While POSTGAP, that was used  
347 for mapping variants to a list of candidate genes, is not designed specifically for gene  
348 prioritization, it reports a variant-to-gene mapping score based on the sum of values for  
349 7 features (**Sup. Figure S8**). We used the maximal variant-to-gene score for each gene  
350 to construct a ranked list of genes. First, we estimated the largest possible  $PU$ -score for  
351 the model using only POSTGAP-based gene ranking for educational attainment data ( $PU$ -  
352 score = 3.82). We limited feature space to exactly the same 7 features and constructed  
353 gene prioritization using GPrior, resulting in ~10% increase in  $PU$ -score ( $PU$ -score = 4.1).  
354 GPrior uses all available features, while POSTGAP score is limited by only initial 7  
355 features, yet expanding feature space for GPrior yields significant increase leading to the  
356 maximal  $PU$ -score of 4.84 (**Sup. Figure S7**), showing ~27% increase in quality.

### 357 Case study 3: Coronary artery disease (CAD)

358  
359 We used the summary statistics of coronary artery disease GWAS of 34,541 CAD  
360 cases and 261,984 controls from UK Biobank followed by replication in 88,192 cases and  
361 162,544 controls<sup>40</sup>. After preprocessing we obtained a gene-based data matrix with 2,794  
362 gene candidates found in loci with original  $p$ -value  $< 10^{-8}$ .

363 Recent review by Khera and Kathiresan<sup>41</sup> was used to compile gene sets for  
364 GPrior (**Figure 4A**). All genes with identified biological roles in any of the known disease  
365 pathways were used for the training set (TS=18, AES=8). All other genes, implicated in  
366 CAD, but with yet undiscovered molecular pathway membership became a validation set  
367 (VS=37) (**Suppl. Table S9**).

368 Prioritization list obtained with GPrior (**Sup. Table S10**) has shown the best  
369 accuracy with all quality metrics in comparison with other methods (**Figure 4B-E, Sup.**  
370 **Table 11**).

371 Conclusively, using risk genes with known molecular pathway membership GPrior  
372 successfully prioritizes genes with yet unknown biological contribution but confidently  
373 implicated in the disease. Importantly, by further analyzing feature importance in the  
374 prediction model it is possible to build testable biological hypotheses for novel genes  
375 discovered in predictions.

#### 376 Case study 4: Schizophrenia

377  
378 We used GWAS Summary statistics from Pardiñas et al <sup>42</sup>. This study used  
379 genotypes of 105 318 individuals, 40,675 schizophrenia cases and 64,643 controls.

380 After preprocessing we obtained a gene-based data matrix with 3,831 gene  
381 candidates found in loci with original  $p$ -value  $< 10^{-6}$ .

382 Training set was prepared using reported genes found in monogenic loci from  
383 GWAS meta-analysis results <sup>42</sup>. Training gene set for individual ML algorithms included  
384 20 genes with  $p$ -values falling in range  $10^{-44}$  -  $10^{-14}$ , and algorithm evaluation set included  
385 24 genes with  $p$ -values within  $10^{-13}$  -  $10^{-8}$  range. Validation set (VS) included 28 genes  
386 and was obtained from the same study and included all genes from significant polygenic  
387 loci (**Figure 5A, Sup. Table S12, S13**).

388 GPrior demonstrated superior results in comparison with other methods using all  
389 quality metrics. GPrior achieved the highest PU score (9.64) and AUC (0.92) values. On  
390 all the top intervals of the predictions list (1%,5%,15%,25%) GPrior showed the highest  
391 enrichment of the validation set genes (**Figure 5B-E, Sup. Table S14**).

392 Conclusively, even for complex phenotypes with limited biological mechanism  
393 knowledge, like schizophrenia, GPrior is well powered to detect the relevant signal of  
394 biologic relatedness and prioritize likely disease genes.

#### 395 **MAGMA comparison**

396  
397 We compared GPrior with a commonly used method that takes GWAS summary  
398 statistics as an input and attempts to pinpoint likely disease genes - MAGMA <sup>27</sup>. It  
399 computes gene-based  $p$ -value (mean association of SNPs in the gene, corrected for LD).  
400 We ran MAGMA with default parameters and compared performance quality with GPrior.  
401 As an output MAGMA returns a list of genes and corresponding  $p$ -values, which we used  
402 to sort the list for prioritization purposes.

403 One of the challenges for a non-biased comparison was the relatively small  
404 number of gene candidates in output from MAGMA. Therefore, we took the same as

405 reported in MAGMA number of top genes from GPrior results to compare equal number  
406 of gene predictions.

407 GPrior demonstrated enrichment of top ranked predictions for validation sets for  
408 all phenotypes – EA ( $p$ -value= $9 \times 10^{-3}$ ), schizophrenia ( $p$ -value= $7 \times 10^{-4}$ ), CAD ( $p$ -  
409 value= $3 \times 10^{-3}$ ) and IBD ( $p$ -value=0.019). MAGMA produced significantly enriched  
410 predictions only for CAD ( $p$ -value= $9 \times 10^{-3}$ ) (**Suppl. Figure S9**).

411 Conclusively, GPrior demonstrated best performance out of all evaluated  
412 approaches for gene prioritization in multiple settings and for various phenotypes.

#### 413 **4. Discussion**

414  
415 A large number of GWAS studies performed to date provide an invaluable source  
416 of information for generating biological hypotheses for disease causes. The majority of  
417 these studies greatly benefited from fine-mapping that implicated a limited number of  
418 gene candidates. However, for highly polygenic phenotypes like schizophrenia, known  
419 genes represent only a tiny segment of the disease biology.

420 The challenge of mapping “variants to function” could greatly benefit from machine  
421 learning approaches. Especially, for those phenotypes for which a strictly genetic fine-  
422 mapping approach has had limited success in conclusively identifying risk genes. As we  
423 illustrate, conventional positive-negative machine learning approaches require a  
424 substantial fraction of already known disease genes to achieve sufficient prioritization  
425 quality for novel candidates. Additionally, it is nearly impossible at this point to confidently  
426 state that a gene is not involved in a disease, therefore, directly assuming “negative”  
427 examples for training is fated to include false negatives in a training set, further reducing  
428 prediction quality.

429 Instead, we provide a tool that uses positive-unlabeled learning and requires  
430 confidence in selection of only positive instances for training. Such genes are relatively  
431 easy to identify based on association significance, previously reported functional studies,  
432 etc. Importantly, PU-learning performs well even when the training set is quite small.

433 Additional challenge for a single-method-based solution is presented by phenotype  
434 complexity. Phenotypes may present significantly different genetic architectures or  
435 impose certain limitations on the set of available data sources; therefore, it is unlikely that  
436 a single technique will be suitable for gene prioritization in all of them. We provide a  
437 software package for gene prioritization – GPrior that takes advantage of the ensemble  
438 of PU-learning techniques. Such approach overcomes unresolved challenges of PN-  
439 learning and issues arising from phenotype complexity. In GPrior, two key steps of the  
440 model training: PU-classifiers training and selection of optimal classifiers combination are  
441 performed using two independent gene sets. The two-step strategy ensures independent  
442 quality assessment for all classifiers and unbiased selection of the optimal prioritization  
443 method, as well as delivering optimal prioritization results for the specific phenotype.

444 GPrior can be utilized with many sources of functional data. Data types used in our  
445 case studies – tissue expression levels, Reactome pathway data and others represent  
446 only a small part of possibilities. Each phenotype study would significantly benefit from  
447 inclusion of additional features, such as – single cell expression data, specific protein-  
448 protein interactions, gene conservation metrics (pLI, LOEUF) and others. In our study we  
449 have not selected features to be specific to each phenotype, therefore, users can expect  
450 to see even higher performance in case of thorough feature selection. Additionally, GPrior  
451 can be straightforwardly integrated with conventional fine-mapping tools. One of the  
452 limiting steps in our GWAS processing scheme was naïve selection of gene candidates  
453 from each locus. More sophisticated preprocessing of the raw GWAS summary statistics  
454 with methods such as SuSie or FINEMAP to improve variant-to-gene mapping could  
455 significantly aid variant-level to gene-level features transformation. Finally, we used a  
456 relatively conservative set of features for gene annotations, which could be significantly  
457 expanded with phenotype specific annotations.

458 Altogether, GPrior fills an important and currently underdeveloped niche of  
459 methods for GWAS data post-processing, significantly improving the ability to pinpoint  
460 disease genes compared to existing solutions.

461

#### 462 **Code availability**

463

464 <https://github.com/faramer86/GPrior>

465

#### 466 **Acknowledgements**

467 Authors would like to thank Dr. Alexey Sergushichev (ITMO University) and Dr. Maxim  
468 Artyomov (Washington University in St. Louis) for helpful discussions.

469

#### 470 **References**

471

- 472 1. Ding, K. & Kullo, I. J. Methods for the selection of tagging SNPs: a comparison of tagging  
473 efficiency and performance. *Eur. J. Hum. Genet.* **15**, 228–236 (2007).
- 474 2. Foulkes, A. S. *Applied Statistical Genetics with R: For Population-based Association*  
475 *Studies*. (Springer Science & Business Media, 2009).
- 476 3. Spain, S. L. & Barrett, J. C. Strategies for fine-mapping complex traits. *Hum. Mol. Genet.*  
477 **24**, R111–9 (2015).
- 478 4. Stephens, M. & Balding, D. J. Bayesian statistical methods for genetic association studies.  
479 *Nature Reviews Genetics* vol. 10 681–690 (2009).
- 480 5. Benner, C. *et al.* FINEMAP: efficient variable selection using summary data from genome-  
481 wide association studies. *Bioinformatics* **32**, 1493–1501 (2016).
- 482 6. Kichaev, G. *et al.* Integrating Functional Data to Prioritize Causal Variants in Statistical  
483 Fine-Mapping Studies. *PLoS Genetics* vol. 10 e1004722 (2014).
- 484 7. Pickrell, J. K. Joint analysis of functional genomic data and genome-wide association  
485 studies of 18 human traits. *Am. J. Hum. Genet.* **94**, 559–573 (2014).
- 486 8. Wang, G., Sarkar, A., Carbonetto, P. & Stephens, M. A simple new approach to variable

- 487 selection in regression, with application to genetic fine-mapping. doi:10.1101/501114.  
488 9. Rossin, E. J. *et al.* Proteins encoded in genomic regions associated with immune-mediated  
489 disease physically interact and suggest underlying biology. *PLoS Genet.* **7**, e1001273  
490 (2011).  
491 10. Peat, G. *et al.* The Open Targets Post-GWAS analysis pipeline. *Bioinformatics* (2020)  
492 doi:10.1093/bioinformatics/btaa020.  
493 11. Consortium, G. & GTEx Consortium. Erratum: Genetic effects on gene expression across  
494 human tissues. *Nature* vol. 553 530–530 (2018).  
495 12. Andersson, R. *et al.* An atlas of active enhancers across human cell types and tissues.  
496 *Nature* **507**, 455–461 (2014).  
497 13. Boyle, A. P. *et al.* Annotation of functional variation in personal genomes using  
498 RegulomeDB. *Genome Res.* **22**, 1790–1797 (2012).  
499 14. Bromberg, Y. Chapter 15: disease gene prioritization. *PLoS Comput. Biol.* **9**, e1002902  
500 (2013).  
501 15. Adie, E. A., Adams, R. R., Evans, K. L., Porteous, D. J. & Pickard, B. S. Speeding disease  
502 gene discovery by sequence based candidate prioritization. *BMC Bioinformatics* **6**, 55  
503 (2005).  
504 16. Xu, J. & Li, Y. Discovering disease-genes by topological features in human protein–protein  
505 interaction network. *Bioinformatics* vol. 22 2800–2805 (2006).  
506 17. Smalter, A., Lei, S. F. & Chen, X.-W. Human Disease–Gene Classification with Integrative  
507 Sequence-Based and Topological Features of Protein-Protein Interaction Networks. *2007*  
508 *IEEE International Conference on Bioinformatics and Biomedicine (BIBM 2007)* (2007)  
509 doi:10.1109/bibm.2007.47.  
510 18. Isakov, O., Dotan, I. & Ben-Shachar, S. Machine Learning–Based Gene Prioritization  
511 Identifies Novel Candidate Risk Genes for Inflammatory Bowel Disease. *Inflammatory*  
512 *Bowel Diseases* vol. 23 1516–1523 (2017).  
513 19. Denis, F. PAC Learning from Positive Statistical Queries. *Lecture Notes in Computer*  
514 *Science* 112–126 (1998) doi:10.1007/3-540-49730-7\_9.  
515 20. Sriphaew, K., Takamura, H. & Okumura, M. Cool Blog Classification from Positive and  
516 Unlabeled Examples. *Advances in Knowledge Discovery and Data Mining* 62–73 (2009)  
517 doi:10.1007/978-3-642-01307-2\_9.  
518 21. Zhang, B. & Zuo, W. Learning from Positive and Unlabeled Examples: A Survey. *2008*  
519 *International Symposiums on Information Processing* (2008) doi:10.1109/isip.2008.79.  
520 22. Mordelet, F. & Vert, J. A bagging SVM to learn from positive and unlabeled examples.  
521 *Pattern Recognition Letters* vol. 37 201–209 (2014).  
522 23. Yang, P., Li, X., Chua, H.-N., Kwok, C.-K. & Ng, S.-K. Ensemble positive unlabeled learning  
523 for disease gene identification. *PLoS One* **9**, e97079 (2014).  
524 24. Scott, C., Blanchard, G. Novelty detection: unlabeled data definitely help. *AISTATS '09*  
525 *Proceedings of the Twelfth International Conference on Artificial Intelligence and Statistics,*  
526 *JMLR: W&CP* **5**, 464–471 (2009).  
527 25. Liu, B., Lee, W.S. Learning with positive and unlabeled examples using weighted logistic  
528 regression. *Proceedings of the 20th international conference on machine learning* **20**, 448–  
529 455 (2003).  
530 26. Chen, J., Bardes, E. E., Aronow, B. J. & Jegga, A. G. ToppGene Suite for gene list  
531 enrichment analysis and candidate gene prioritization. *Nucleic Acids Res.* **37**, W305–11  
532 (2009).  
533 27. de Leeuw, C. A., Mooij, J. M., Heskes, T. & Posthuma, D. MAGMA: generalized gene-set  
534 analysis of GWAS data. *PLoS Comput. Biol.* **11**, e1004219 (2015).  
535 28. Lehne, B., Lewis, C. M. & Schlitt, T. From SNPs to Genes: Disease Association at the  
536 Gene Level. *PLoS ONE* vol. 6 e20133 (2011).  
537 29. Stranger, B. E. *et al.* Population genomics of human gene expression. *Nat. Genet.* **39**,

- 538 1217–1224 (2007).
- 539 30. Ala, U. *et al.* Prediction of human disease genes by human-mouse conserved coexpression  
540 analysis. *PLoS Comput. Biol.* **4**, e1000043 (2008).
- 541 31. Jassal, B. *et al.* The reactome pathway knowledgebase. *Nucleic Acids Res.* **48**, D498–  
542 D503 (2020).
- 543 32. Kent, W. J. *et al.* Exploring relationships and mining data with the UCSC Gene Sorter.  
544 *Genome Res.* **15**, 737–741 (2005).
- 545 33. Fine, R. S., Pers, T. H., Amariuta, T., Raychaudhuri, S. & Hirschhorn, J. N. Benchmark:  
546 An Unbiased, Association-Data-Driven Strategy to Evaluate Gene Prioritization Algorithms.  
547 *Am. J. Hum. Genet.* **104**, 1025–1039 (2019).
- 548 34. Altman, N. & Krzywinski, M. The curse(s) of dimensionality. *Nat. Methods* **15**, 399–400  
549 (2018).
- 550 35. Claesen, M., De Smet, F., Suykens, J. A. K. & De Moor, B. A robust ensemble approach to  
551 learn from positive and unlabeled data using SVM base models. *Neurocomputing* vol. 160  
552 73–84 (2015).
- 553 36. Boyle, E. A., Li, Y. I. & Pritchard, J. K. An Expanded View of Complex Traits: From  
554 Polygenic to Omnigenic. *Cell* **169**, 1177–1186 (2017).
- 555 37. Liu, B., Dai, Y., Li, X., Lee, W. S. & Yu, P. S. Building text classifiers using positive and  
556 unlabeled examples. *Third IEEE International Conference on Data Mining*  
557 doi:10.1109/icdm.2003.1250918.
- 558 38. Huang, H. *et al.* Fine-mapping inflammatory bowel disease loci to single-variant resolution.  
559 *Nature* **547**, 173–178 (2017).
- 560 39. Lee, J. J. *et al.* Gene discovery and polygenic prediction from a genome-wide association  
561 study of educational attainment in 1.1 million individuals. *Nat. Genet.* **50**, 1112–1121  
562 (2018).
- 563 40. van der Harst, P. & Verweij, N. Identification of 64 Novel Genetic Loci Provides an  
564 Expanded View on the Genetic Architecture of Coronary Artery Disease. *Circ. Res.* **122**,  
565 433–443 (2018).
- 566 41. Khera, A. V. & Kathiresan, S. Genetics of coronary artery disease: discovery, biology and  
567 clinical translation. *Nat. Rev. Genet.* **18**, 331–344 (2017).
- 568 42. Pardiñas, A. F. *et al.* Common schizophrenia alleles are enriched in mutation-intolerant  
569 genes and in regions under strong background selection. *Nat. Genet.* **50**, 381–389 (2018).
- 570

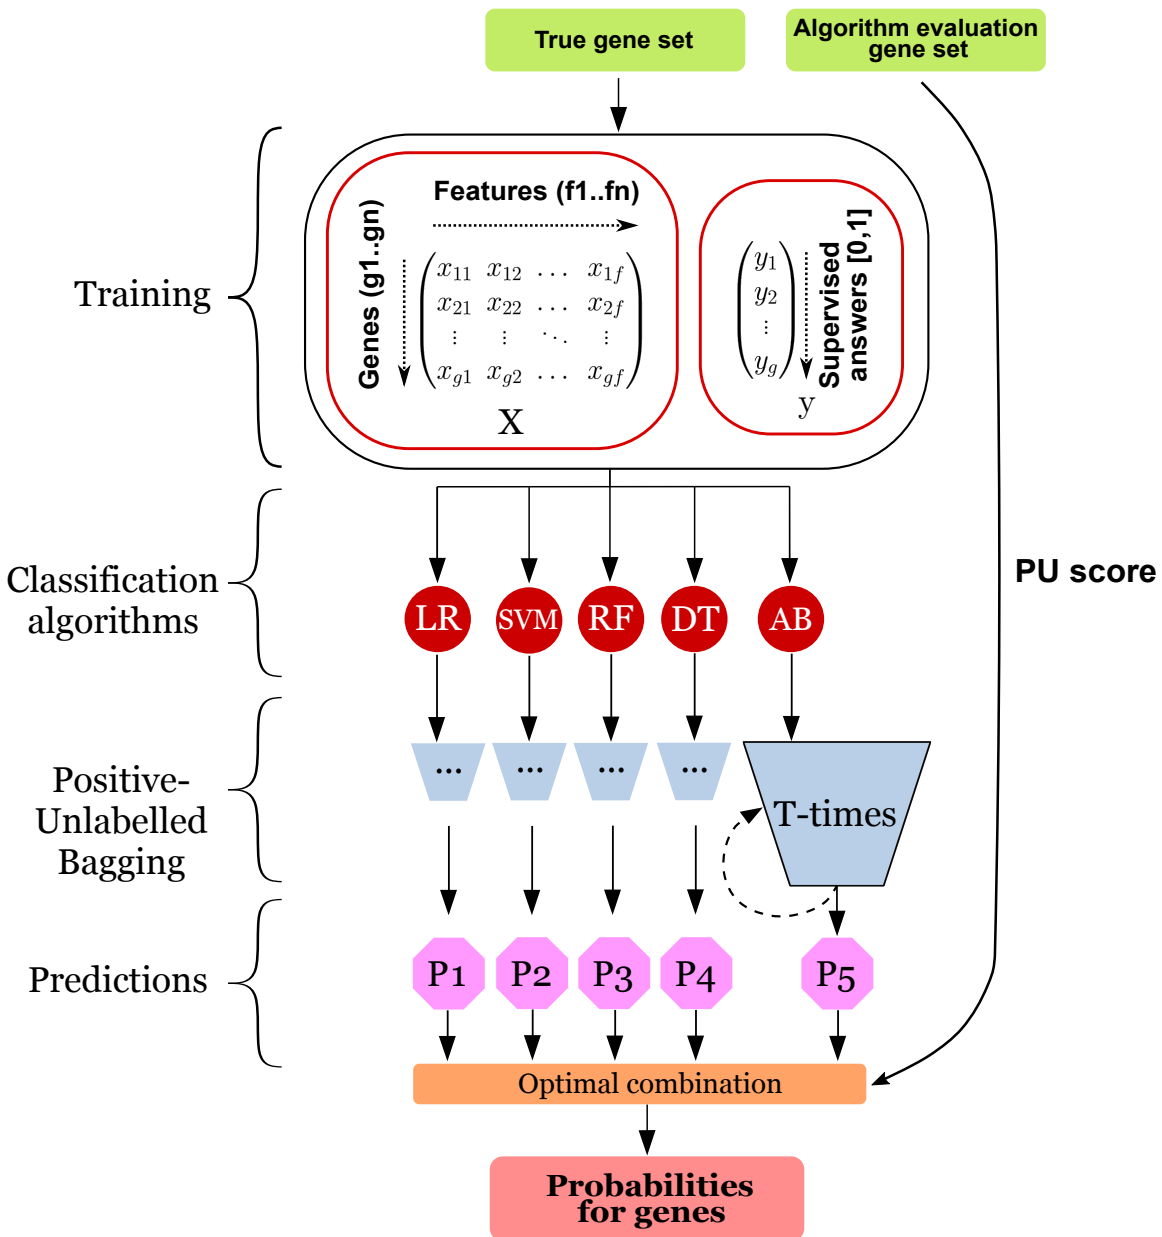

**Figure 1. GPrior ensemble positive-unlabeled learning framework**

Matrix of gene features along with vector of supervised answers is used to train 5 models using PU-bagging approach. Two independent gene sets are used for training – true set of genes for individual classification algorithms training and algorithm evaluation set of true genes for selecting the optimal combination of the predictions. Predictions are generated using positive-unlabeled bagging and further an optimal combination returning the largest *PU*-score is returned.



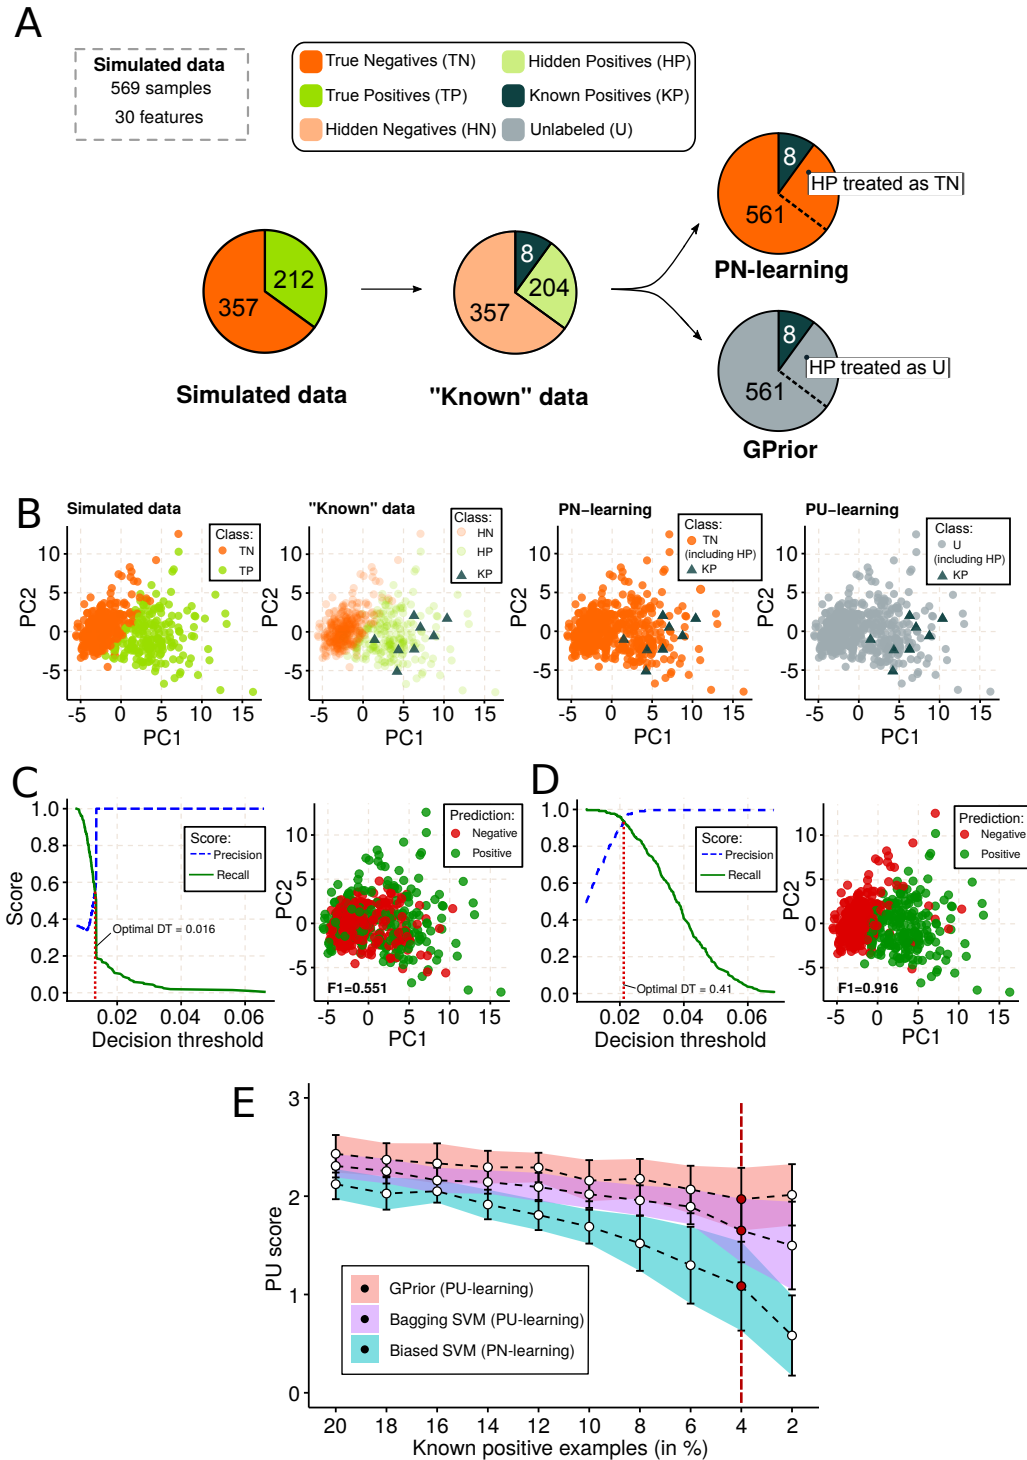

**Figure 2. Benchmark dataset shows advantage of PU learning over PN learning in a scenario when few positive instances used for training.**

(A) Dataset breakdown. Known data represents scenario when only a part of the true positive instances were discovered to date; (B) PCA of the simulated data with highlighted true instance classes; (C) Prediction results for PN-learning (biased SVM) approach; (D) Prediction results for GPrior; (E) Performance of PU and PN learning approaches with respect to a fraction of known positive data points.

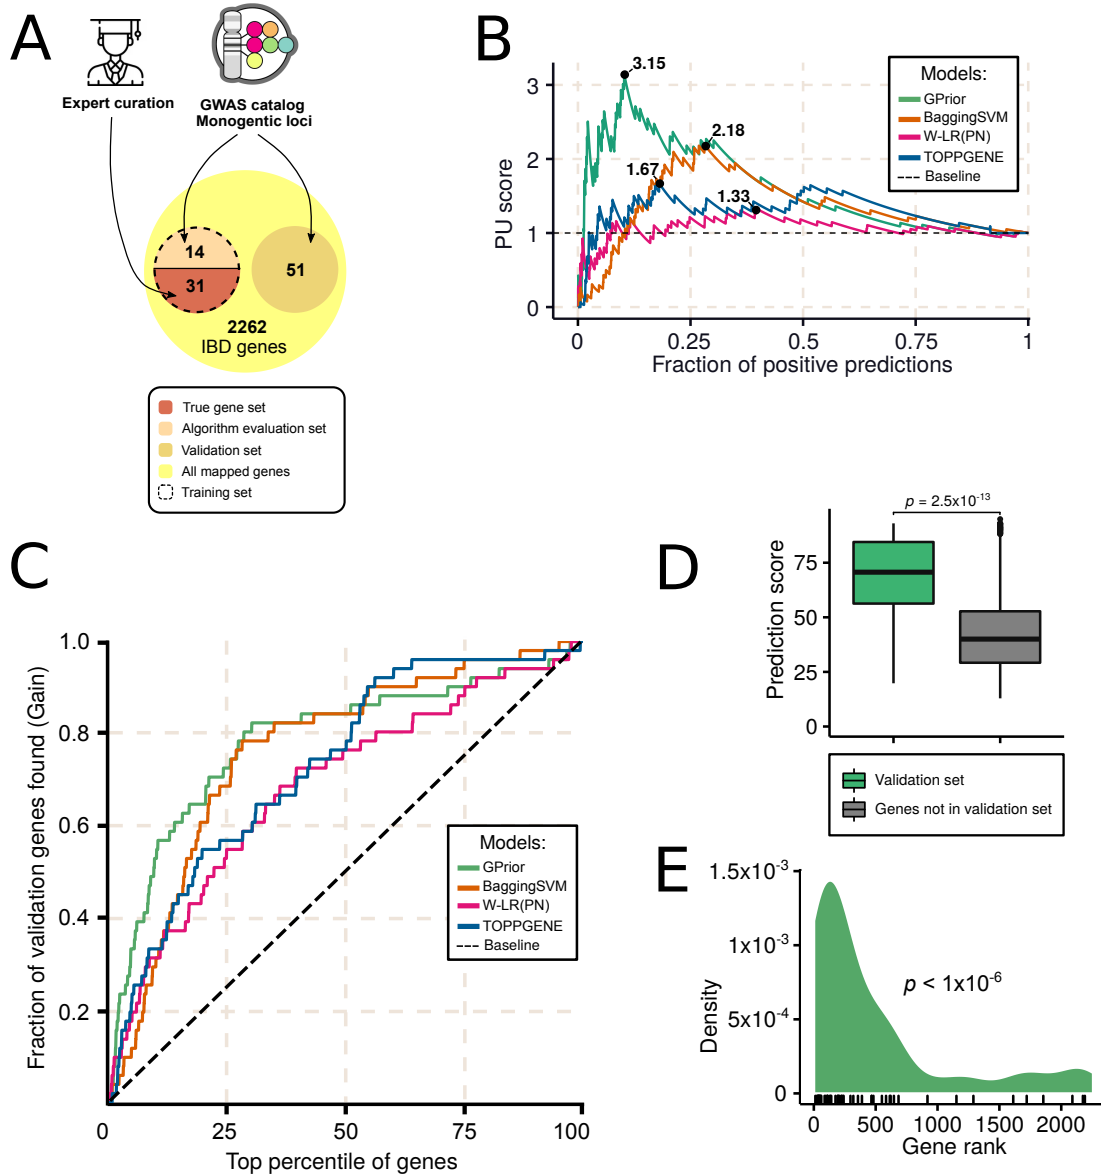

**Figure 3. Gene prioritization for inflammatory bowel disease GWAS.**

**(A)** Scheme for selection of training, algorithm evaluation and validation gene sets; **(B)** Classification quality comparison for GPrior, Bagging SVM and conventional PN-learning with weighted linear regression; **(C)** Cumulative gains curve shows better prioritization of true genes at the top of the candidate list using GPrior in comparison with other methods; **(D)** True genes from the independent validation gene set receive significantly higher scores than genes found within the same loci but not implicated in the disease; **(E)** Enrichment of true genes from independent validation gene set among top predictions from GPrior.

573  
574

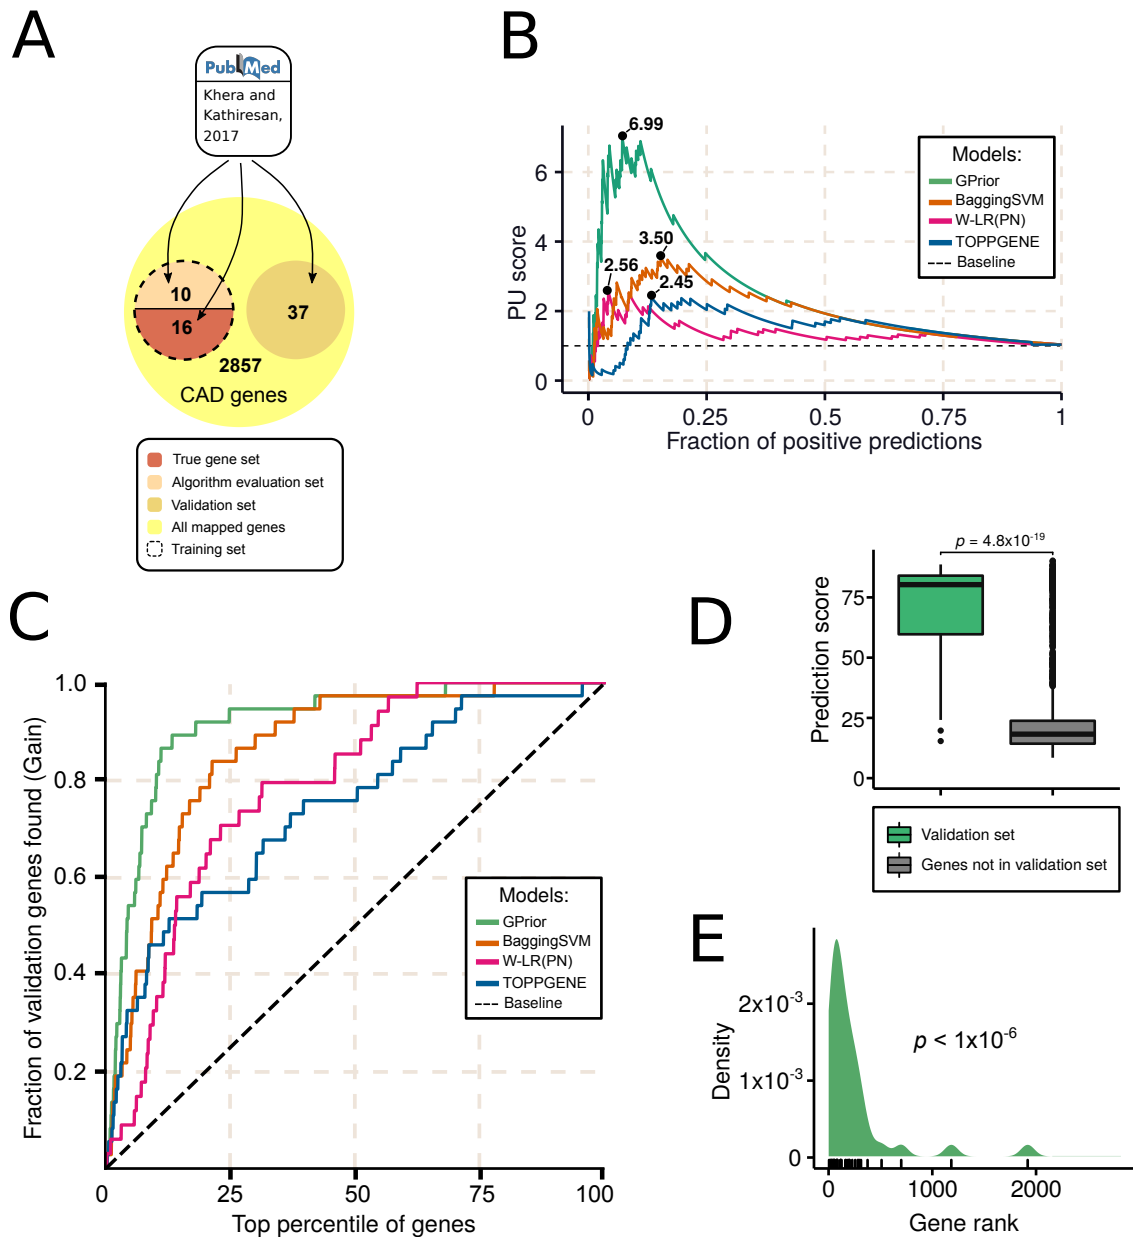

**Figure 4. Gene prioritization for coronary artery disease GWAS.**

(A) Scheme for selection of training, algorithm evaluation and validation gene sets; (B) Classification quality comparison for GPrior, Bagging SVM and conventional PN-learning with weighted linear regression; (C) Cumulative gains curve shows better prioritization of true genes at the top of the candidate list using GPrior in comparison with other methods; (D) True genes from the independent validation gene set receive significantly higher scores than genes found within the same loci but not implicated in the disease; (E) Enrichment of true genes from independent validation gene set among top predictions from GPrior.

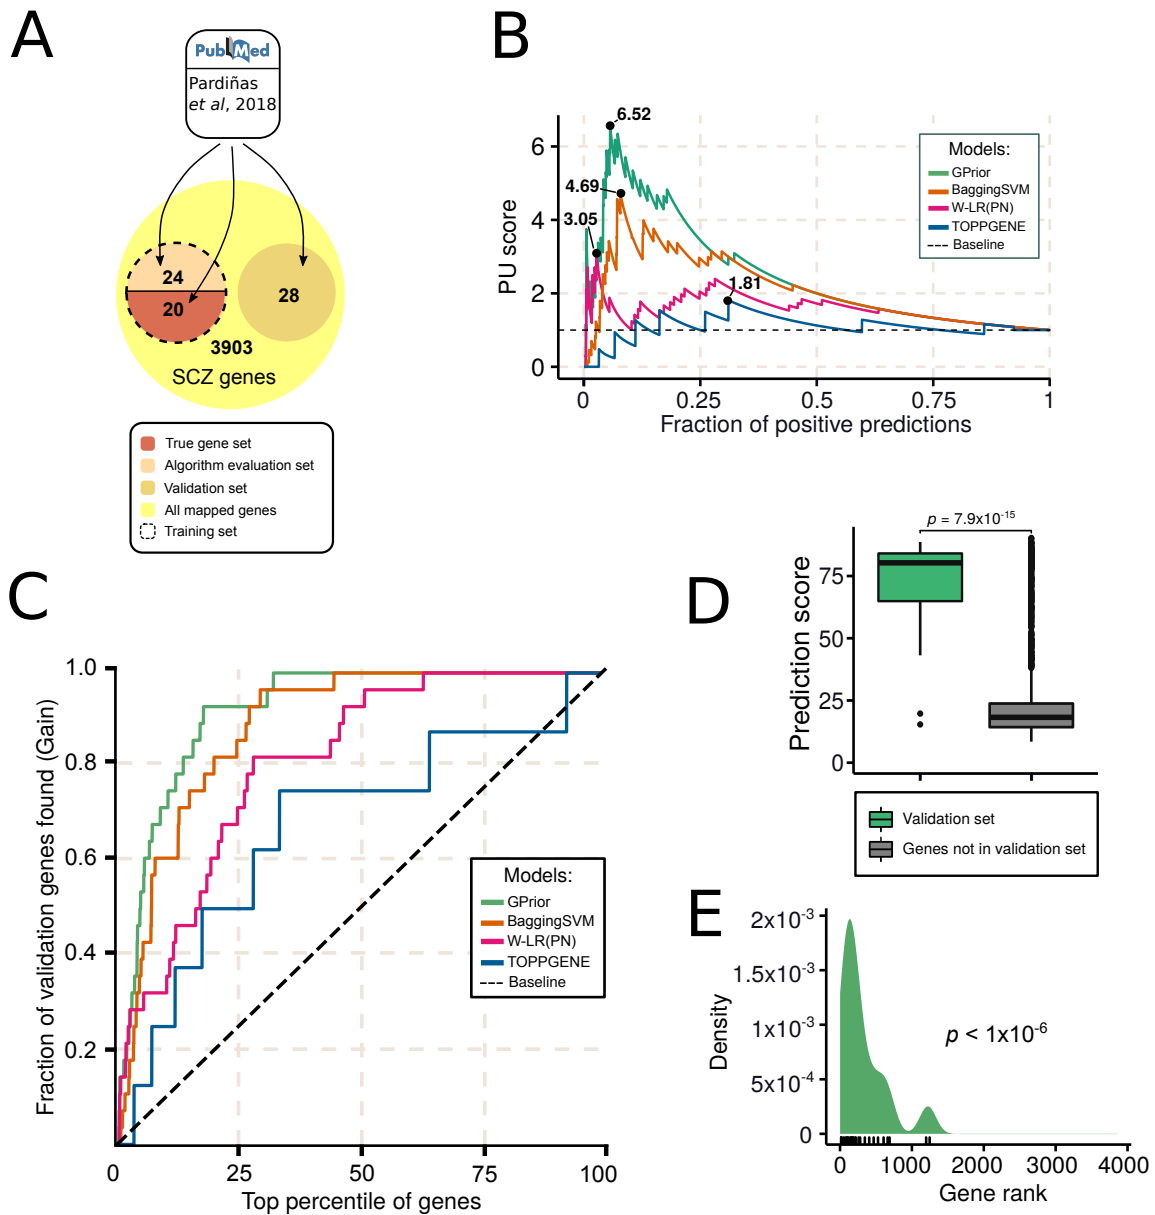

**Figure 5. Gene prioritization for schizophrenia GWAS.**

(A) Scheme for selection of training, algorithm evaluation and validation gene sets; (B) Classification quality comparison for GPrior, Bagging SVM and conventional PN-learning with weighted linear regression; (C) Cumulative gains curve shows better prioritization of true genes at the top of the candidate list using GPrior in comparison with other methods; (D) True genes from the independent validation gene set receive significantly higher scores than genes found within the same loci but not implicated in the disease; (E) Enrichment of true genes from independent validation gene set among top predictions from GPrior.
